# Supplementary material for: Similarity in Temporal Movement Patterns in Laying Hens Increases with Time and Social Association
Source: MDPI journal article supplement (doi:10.3390/ani12050555), 2022-02-23
Supplement: s1 [file s1]

**S4 Table:** Overall descriptors of the association networks derived from 72 observation days. Co-occurrences gives the total number of recorded co-occurrences of two birds at an antenna over the 72 observational days, density gives for the resulting network the proportion of observed links between hens based on co-occurrence, assortativity gives the network-wide assortativity index and community count is the number of sub-communities based on the Newman-Girvan community detection algorithm.

|                 | Pen 11 | Pen 12 | Pen 13 | Pen 14 |
|-----------------|--------|--------|--------|--------|
| Co-occurrences  | 134060 | 95219  | 114310 | 101334 |
| Density         | 0.94   | 0.93   | 0.92   | 0.90   |
| Assortativity   | 0.093  | 0.084  | 0.109  | 0.121  |
| Community count | 5      | 4      | 5      | 6      |
