# Supplementary material for: Similarity in Temporal Movement Patterns in Laying Hens Increases with Time and Social Association
Source: MDPI journal article supplement (doi:10.3390/ani12050555), 2022-02-23
Supplement: s1 [file s1]

**S1 Table:** Individual summary measures of activity and social network parameters. Trans: mean number of transitions, IN: proportion of time spent inside, Out: proportion of time spent outside (stone yard or free range), Entropy: mean sample entropy, Initiator: initiator score, Order out: mean ordinal number for entering the stone yard for the first time on a day, Order in: mean ordinal number for returning from the stone yard for the last time on a day, Days out: number of days the hen was observed at least once in either the stone yard or the free range area, PageRank: Page-Rank centrality in the social network (based on all observational days), Community: community membership base on Newman-Girven community partitioning. Mean numbers are always averaged over all observational days.

| Pen | HenID | Trans | IN   | Out  | Entropy | Initiator | Order out | Order in | Days out | Between | Community |
|-----|-------|-------|------|------|---------|-----------|-----------|----------|----------|---------|-----------|
| 11  | 1     | 47.0  | 0.29 | 0.62 | 0.026   | 0.537     | 39        | 29       | 71       | 2.07    | 11.1      |
| 11  | 2     | 42.9  | 0.34 | 0.17 | 0.021   | 0.477     | 34        | 61       | 70       | 1.69    | 11.3      |
| 11  | 3     | 17.3  | 0.66 | 0.04 | 0.006   | 0.466     | 69        | 32       | 60       | 1.66    | 11.2      |
| 11  | 4     | 41.9  | 0.54 | 0.04 | 0.019   | 0.521     | 49        | 35       | 64       | 3.28    | 11.2      |
| 11  | 6     | 7.1   | 0.96 | 0.00 | 0.003   | 0.438     | 61        | 12       | 3        | 0.18    | 11.2      |
| 11  | 7     | 11.4  | 0.93 | 0.00 | 0.005   | 0.455     | NA        | NA       | 0        | 1.87    | 11.1      |
| 11  | 8     | 60.6  | 0.31 | 0.22 | 0.029   | 0.474     | 25        | 61       | 71       | 3.28    | 11.3      |
| 11  | 9     | 64.6  | 0.45 | 0.18 | 0.030   | 0.477     | 31        | 60       | 70       | 3.28    | 11.3      |
| 11  | 10    | 33.6  | 0.29 | 0.09 | 0.016   | 0.451     | 26        | 41       | 68       | 2.79    | 11.2      |
| 11  | 11    | 56.7  | 0.46 | 0.34 | 0.028   | 0.574     | 55        | 24       | 70       | 3.28    | 11.1      |
| 11  | 12    | 64.6  | 0.37 | 0.11 | 0.027   | 0.548     | 19        | 61       | 70       | 2.07    | 11.2      |
| 11  | 13    | 28.4  | 0.64 | 0.04 | 0.011   | 0.440     | 41        | 20       | 67       | 0.86    | 11.2      |
| 11  | 14    | 18.1  | 0.86 | 0.01 | 0.006   | 0.459     | 47        | 13       | 43       | 1.19    | 11.2      |
| 11  | 15    | 34.4  | 0.38 | 0.22 | 0.018   | 0.505     | 49        | 22       | 67       | 3.28    | 11.1      |
| 11  | 16    | 38.5  | 0.41 | 0.42 | 0.022   | 0.519     | 46        | 13       | 71       | 2.92    | 11.1      |
| 11  | 17    | 52.7  | 0.47 | 0.24 | 0.026   | 0.479     | 60        | 17       | 71       | 0.86    | 11.1      |
| 11  | 18    | 68.8  | 0.34 | 0.21 | 0.035   | 0.470     | 28        | 64       | 70       | 3.28    | 11.3      |
| 11  | 19    | 58.8  | 0.46 | 0.17 | 0.026   | 0.537     | 23        | 26       | 71       | 3.28    | 11.3      |
| 11  | 20    | 64.7  | 0.45 | 0.25 | 0.030   | 0.546     | 35        | 57       | 71       | 1.77    | 11.3      |
| 11  | 21    | 46.0  | 0.54 | 0.11 | 0.019   | 0.430     | 36        | 50       | 67       | 1.77    | 11.2      |
| 11  | 22    | 1.0   | 1.00 | 0.00 | 0.000   | NA        | NA        | NA       | 0        | 0.00    | 11.4      |
| 11  | 23    | 32.5  | 0.35 | 0.08 | 0.016   | 0.483     | 52        | 37       | 68       | 0.59    | 11.2      |
| 11  | 24    | 44.3  | 0.46 | 0.28 | 0.021   | 0.532     | 37        | 46       | 71       | 0.86    | 11.3      |

| Pen | HenID | Trans | IN   | Out  | Entropy | Initiator | Order out | Order in | Days out | Between | Community |
|-----|-------|-------|------|------|---------|-----------|-----------|----------|----------|---------|-----------|
| 11  | 25    | 5.2   | 0.96 | 0.00 | 0.002   | 0.474     | NA        | NA       | 0        | 0.08    | 11.2      |
| 11  | 26    | 13.2  | 0.87 | 0.03 | 0.004   | 0.522     | 35        | 11       | 58       | 0.49    | 11.2      |
| 11  | 27    | 40.6  | 0.46 | 0.37 | 0.021   | 0.492     | 55        | 25       | 70       | 3.28    | 11.1      |
| 11  | 28    | 76.0  | 0.31 | 0.30 | 0.040   | 0.539     | 39        | 60       | 71       | 3.28    | 11.3      |
| 11  | 29    | 67.4  | 0.25 | 0.32 | 0.037   | 0.511     | 22        | 52       | 71       | 0.86    | 11.3      |
| 11  | 30    | 34.5  | 0.78 | 0.07 | 0.008   | 0.476     | 68        | 32       | 69       | 3.28    | 11.2      |
| 11  | 500   | 73.1  | 0.58 | 0.19 | 0.031   | 0.566     | 63        | 18       | 68       | 2.02    | 11.1      |
| 11  | 501   | 56.5  | 0.36 | 0.07 | 0.028   | 0.560     | 55        | 66       | 68       | 2.02    | 11.2      |
| 11  | 503   | 44.1  | 0.33 | 0.09 | 0.024   | 0.536     | 79        | 23       | 64       | 3.28    | 11.1      |
| 11  | 504   | 35.6  | 0.41 | 0.11 | 0.016   | 0.569     | 40        | 38       | 70       | 3.28    | 11.2      |
| 11  | 505   | 23.1  | 0.86 | 0.03 | 0.007   | 0.522     | 86        | 41       | 50       | 1.89    | 11.1      |
| 11  | 506   | 76.2  | 0.58 | 0.09 | 0.031   | 0.538     | 37        | 61       | 71       | 3.28    | 11.2      |
| 11  | 507   | 80.3  | 0.39 | 0.21 | 0.038   | 0.545     | 40        | 63       | 70       | 3.28    | 11.3      |
| 11  | 508   | 25.5  | 0.28 | 0.23 | 0.015   | 0.596     | 45        | 18       | 63       | 1.77    | 11.1      |
| 11  | 509   | 49.1  | 0.39 | 0.24 | 0.026   | 0.551     | 45        | 55       | 69       | 3.19    | 11.3      |
| 11  | 511   | 52.5  | 0.23 | 0.55 | 0.029   | 0.574     | 54        | 35       | 70       | 3.28    | 11.1      |
| 11  | 512   | 38.2  | 0.42 | 0.11 | 0.020   | 0.521     | 78        | 41       | 67       | 2.02    | 11.1      |
| 11  | 513   | 26.8  | 0.67 | 0.04 | 0.010   | 0.535     | 65        | 47       | 60       | 2.95    | 11.2      |
| 11  | 515   | 63.3  | 0.38 | 0.13 | 0.030   | 0.531     | 32        | 52       | 70       | 2.02    | 11.2      |
| 11  | 516   | 56.1  | 0.32 | 0.33 | 0.031   | 0.547     | 55        | 18       | 68       | 2.02    | 11.1      |
| 11  | 518   | 15.1  | 0.65 | 0.07 | 0.007   | 0.491     | 83        | 18       | 40       | 1.89    | 11.1      |
| 11  | 519   | 60.5  | 0.40 | 0.13 | 0.030   | 0.525     | 33        | 44       | 67       | 2.07    | 11.3      |
| 11  | 520   | 22.8  | 0.47 | 0.07 | 0.012   | 0.519     | 69        | 13       | 43       | 1.84    | 11.1      |
| 11  | 521   | 24.6  | 0.57 | 0.06 | 0.012   | 0.524     | 51        | 21       | 29       | 2.07    | 11.1      |
| 11  | 522   | 43.0  | 0.71 | 0.03 | 0.015   | 0.522     | 52        | 19       | 64       | 3.28    | 11.2      |
| 11  | 523   | 49.8  | 0.55 | 0.11 | 0.017   | 0.545     | 28        | 52       | 71       | 1.77    | 11.3      |
| 11  | 524   | 20.8  | 0.62 | 0.03 | 0.010   | 0.498     | 73        | 14       | 44       | 0.76    | 11.1      |
| 11  | 526   | 63.1  | 0.60 | 0.05 | 0.025   | 0.512     | 35        | 30       | 68       | 2.02    | 11.2      |
| 11  | 527   | 16.7  | 0.45 | 0.04 | 0.009   | 0.507     | 49        | 4        | 39       | 1.75    | 11.1      |

| Pen | HenID | Trans | IN   | Out  | Entropy | Initiator | Order out | Order in | Days out | Between | Community |
|-----|-------|-------|------|------|---------|-----------|-----------|----------|----------|---------|-----------|
| 11  | 528   | 36.4  | 0.37 | 0.34 | 0.021   | 0.522     | 53        | 9        | 71       | 2.92    | 11.1      |
| 11  | 529   | 76.8  | 0.35 | 0.26 | 0.037   | 0.519     | 43        | 63       | 71       | 2.07    | 11.3      |
| 11  | 531   | 1.0   | 1.00 | 0.00 | 0.000   | NA        | NA        | NA       | 0        | 0.00    | 11.5      |
| 11  | 532   | 52.1  | 0.36 | 0.10 | 0.023   | 0.520     | 27        | 48       | 71       | 2.02    | 11.2      |
| 11  | 533   | 32.7  | 0.60 | 0.03 | 0.013   | 0.521     | 34        | 36       | 68       | 2.07    | 11.2      |
| 11  | 535   | 21.3  | 0.45 | 0.02 | 0.011   | 0.480     | 92        | 28       | 25       | 3.15    | 11.1      |
| 11  | 536   | 41.3  | 0.28 | 0.38 | 0.022   | 0.509     | 56        | 13       | 69       | 0.86    | 11.1      |
| 11  | 537   | 63.6  | 0.66 | 0.02 | 0.024   | 0.493     | 52        | 27       | 65       | 2.02    | 11.2      |
| 11  | 538   | 22.1  | 0.47 | 0.05 | 0.010   | 0.520     | 53        | 36       | 65       | 3.28    | 11.2      |
| 11  | 540   | 13.8  | 0.62 | 0.07 | 0.007   | 0.502     | 71        | 23       | 39       | 2.07    | 11.1      |
| 11  | 544   | 23.9  | 0.59 | 0.10 | 0.010   | 0.502     | 37        | 25       | 61       | 0.76    | 11.2      |
| 11  | 545   | 36.8  | 0.33 | 0.48 | 0.020   | 0.523     | 52        | 29       | 70       | 2.92    | 11.1      |
| 11  | 546   | 30.7  | 0.27 | 0.62 | 0.018   | 0.533     | 48        | 36       | 70       | 1.89    | 11.1      |
| 11  | 547   | 49.5  | 0.32 | 0.35 | 0.027   | 0.503     | 60        | 21       | 71       | 2.07    | 11.1      |
| 11  | 548   | 36.0  | 0.48 | 0.04 | 0.016   | 0.466     | 64        | 45       | 68       | 2.02    | 11.2      |
| 11  | 549   | 51.6  | 0.61 | 0.07 | 0.021   | 0.462     | 67        | 55       | 68       | 2.02    | 11.2      |
| 11  | 550   | 33.8  | 0.35 | 0.54 | 0.019   | 0.525     | 60        | 51       | 70       | 1.75    | 11.1      |
| 11  | 551   | 68.3  | 0.29 | 0.12 | 0.030   | 0.492     | 30        | 56       | 70       | 2.07    | 11.2      |
| 11  | 552   | 63.2  | 0.21 | 0.29 | 0.034   | 0.533     | 25        | 58       | 71       | 3.28    | 11.3      |
| 11  | 553   | 64.0  | 0.25 | 0.29 | 0.034   | 0.520     | 26        | 57       | 71       | 3.28    | 11.3      |
| 11  | 555   | 43.0  | 0.34 | 0.21 | 0.025   | 0.504     | 42        | 10       | 68       | 3.28    | 11.1      |
| 11  | 556   | 17.8  | 0.88 | 0.04 | 0.005   | 0.453     | 72        | 24       | 48       | 0.80    | 11.1      |
| 11  | 557   | 45.0  | 0.32 | 0.26 | 0.023   | 0.518     | 22        | 47       | 70       | 2.07    | 11.3      |
| 11  | 558   | 36.3  | 0.30 | 0.47 | 0.021   | 0.499     | 42        | 26       | 71       | 2.92    | 11.1      |
| 11  | 562   | 66.8  | 0.62 | 0.14 | 0.025   | 0.501     | 35        | 53       | 70       | 3.28    | 11.3      |
| 11  | 563   | 29.6  | 0.57 | 0.31 | 0.011   | 0.478     | 62        | 15       | 71       | 1.77    | 11.1      |
| 11  | 564   | 42.0  | 0.63 | 0.07 | 0.018   | 0.453     | 70        | 34       | 57       | 3.28    | 11.1      |
| 11  | 565   | 55.0  | 0.28 | 0.29 | 0.029   | 0.504     | 27        | 51       | 71       | 3.28    | 11.3      |
| 11  | 566   | 68.6  | 0.39 | 0.21 | 0.035   | 0.504     | 33        | 65       | 70       | 0.59    | 11.3      |

| Pen | HenID | Trans | IN   | Out  | Entropy | Initiator | Order out | Order in | Days out | Between | Community |
|-----|-------|-------|------|------|---------|-----------|-----------|----------|----------|---------|-----------|
| 11  | 567   | 49.6  | 0.45 | 0.17 | 0.021   | 0.501     | 38        | 56       | 71       | 2.02    | 11.3      |
| 11  | 568   | 63.3  | 0.36 | 0.18 | 0.030   | 0.482     | 29        | 50       | 71       | 2.92    | 11.3      |
| 11  | 569   | 37.4  | 0.76 | 0.01 | 0.014   | 0.443     | 69        | 15       | 60       | 3.28    | 11.2      |
| 11  | 570   | 12.6  | 0.74 | 0.24 | 0.005   | 0.520     | 57        | 12       | 62       | 1.51    | 11.1      |
| 11  | 571   | 57.0  | 0.45 | 0.18 | 0.024   | 0.484     | 20        | 64       | 71       | 3.28    | 11.3      |
| 11  | 573   | 61.9  | 0.54 | 0.03 | 0.026   | 0.443     | 62        | 54       | 69       | 3.28    | 11.2      |
| 11  | 576   | 48.5  | 0.36 | 0.36 | 0.026   | 0.466     | 41        | 30       | 70       | 2.02    | 11.1      |
| 11  | 578   | 52.6  | 0.52 | 0.06 | 0.022   | 0.450     | 55        | 49       | 70       | 3.15    | 11.2      |
| 11  | 579   | 66.4  | 0.21 | 0.24 | 0.035   | 0.471     | 24        | 66       | 71       | 2.02    | 11.3      |
| 11  | 580   | 32.5  | 0.41 | 0.06 | 0.015   | 0.444     | 59        | 51       | 69       | 2.07    | 11.2      |
| 11  | 581   | 45.2  | 0.37 | 0.11 | 0.022   | 0.459     | 42        | 50       | 66       | 3.28    | 11.2      |
| 11  | 583   | 33.2  | 0.54 | 0.18 | 0.014   | 0.482     | 58        | 59       | 66       | 1.95    | 11.3      |
| 11  | 584   | 73.0  | 0.27 | 0.28 | 0.038   | 0.485     | 25        | 66       | 71       | 2.02    | 11.3      |
| 11  | 586   | 57.2  | 0.22 | 0.12 | 0.027   | 0.432     | 22        | 41       | 71       | 3.28    | 11.2      |
| 11  | 587   | 54.9  | 0.49 | 0.13 | 0.023   | 0.451     | 43        | 48       | 71       | 2.02    | 11.3      |
| 11  | 589   | 52.7  | 0.54 | 0.05 | 0.022   | 0.444     | 60        | 60       | 68       | 0.86    | 11.2      |
| 11  | 591   | 38.5  | 0.70 | 0.02 | 0.014   | 0.445     | 45        | 35       | 66       | 3.28    | 11.2      |
| 11  | 592   | 22.8  | 0.39 | 0.40 | 0.013   | 0.453     | 35        | 20       | 68       | 1.96    | 11.1      |
| 11  | 593   | 40.6  | 0.59 | 0.07 | 0.018   | 0.424     | 42        | 45       | 67       | 2.07    | 11.2      |
| 11  | 594   | 42.9  | 0.38 | 0.43 | 0.022   | 0.440     | 52        | 36       | 71       | 0.57    | 11.1      |
| 11  | 595   | 39.3  | 0.25 | 0.54 | 0.023   | 0.448     | 31        | 34       | 71       | 3.28    | 11.1      |
| 11  | 596   | 9.5   | 0.91 | 0.00 | 0.003   | 0.384     | NA        | NA       | 0        | 0.16    | 11.2      |
| 11  | 597   | 23.5  | 0.78 | 0.01 | 0.008   | 0.395     | 56        | 15       | 43       | 2.02    | 11.2      |
| 11  | 598   | 2.6   | 0.99 | 0.00 | 0.002   | 0.464     | 42        | 16       | 6        | 0.08    | 11.1      |
| 11  | 600   | 65.4  | 0.29 | 0.50 | 0.035   | 0.436     | 44        | 38       | 70       | 3.15    | 11.1      |
| 11  | 601   | 35.1  | 0.52 | 0.11 | 0.017   | 0.413     | 48        | 32       | 51       | 3.28    | 11.1      |
| 11  | 603   | 43.4  | 0.44 | 0.07 | 0.019   | 0.417     | 69        | 58       | 68       | 2.07    | 11.2      |
| 12  | 31    | 1.5   | 0.99 | 0.00 | 0.001   | 0.521     | 74        | 8        | 8        | 0.00    | 12.1      |
| 12  | 32    | 47.5  | 0.36 | 0.14 | 0.017   | 0.503     | 35        | 58       | 71       | 0.74    | 12.2      |

| Pen | HenID | Trans | IN   | Out  | Entropy | Initiator | Order out | Order in | Days out | Between | Community |
|-----|-------|-------|------|------|---------|-----------|-----------|----------|----------|---------|-----------|
| 12  | 33    | 35.8  | 0.33 | 0.22 | 0.017   | 0.539     | 23        | 45       | 71       | 3.16    | 12.2      |
| 12  | 34    | 1.0   | 1.00 | 0.00 | 0.000   | NA        | NA        | NA       | 0        | 0.00    | 12.3      |
| 12  | 35    | 19.9  | 0.58 | 0.06 | 0.007   | 0.582     | 73        | 44       | 62       | 0.26    | 12.1      |
| 12  | 36    | 28.4  | 0.51 | 0.05 | 0.011   | 0.501     | 43        | 11       | 69       | 0.56    | 12.2      |
| 12  | 37    | 24.8  | 0.40 | 0.04 | 0.011   | 0.513     | 88        | 50       | 60       | 0.26    | 12.1      |
| 12  | 38    | 39.4  | 0.30 | 0.15 | 0.018   | 0.478     | 36        | 68       | 72       | 6.09    | 12.2      |
| 12  | 39    | 1.0   | 1.00 | 0.00 | 0.000   | NA        | NA        | NA       | 0        | 0.00    | 12.4      |
| 12  | 40    | 6.1   | 0.97 | 0.00 | 0.002   | 0.437     | 94        | 34       | 1        | 2.05    | 12.1      |
| 12  | 41    | 26.8  | 0.29 | 0.06 | 0.013   | 0.442     | 52        | 33       | 69       | 0.70    | 12.1      |
| 12  | 42    | 47.0  | 0.15 | 0.35 | 0.024   | 0.564     | 14        | 82       | 71       | 0.74    | 12.2      |
| 12  | 43    | 49.4  | 0.23 | 0.25 | 0.024   | 0.548     | 16        | 55       | 71       | 3.16    | 12.2      |
| 12  | 44    | 8.6   | 0.85 | 0.01 | 0.007   | 0.478     | 67        | 8        | 26       | 0.49    | 12.1      |
| 12  | 45    | 17.8  | 0.67 | 0.14 | 0.005   | 0.528     | 58        | 13       | 66       | 0.26    | 12.1      |
| 12  | 46    | 33.0  | 0.44 | 0.12 | 0.013   | 0.530     | 64        | 31       | 68       | 8.11    | 12.2      |
| 12  | 47    | 30.9  | 0.66 | 0.03 | 0.011   | 0.445     | 59        | 15       | 66       | 3.16    | 12.1      |
| 12  | 48    | 36.0  | 0.24 | 0.18 | 0.018   | 0.443     | 30        | 48       | 70       | 0.74    | 12.2      |
| 12  | 49    | 36.4  | 0.24 | 0.23 | 0.018   | 0.505     | 22        | 74       | 71       | 0.74    | 12.2      |
| 12  | 50    | 24.0  | 0.51 | 0.06 | 0.008   | 0.520     | 73        | 21       | 70       | 3.16    | 12.1      |
| 12  | 51    | 54.8  | 0.40 | 0.21 | 0.023   | 0.568     | 16        | 55       | 70       | 5.53    | 12.2      |
| 12  | 52    | 55.2  | 0.26 | 0.43 | 0.023   | 0.493     | 19        | 61       | 72       | 0.74    | 12.2      |
| 12  | 53    | 27.3  | 0.31 | 0.03 | 0.014   | 0.504     | 64        | 27       | 66       | 3.05    | 12.1      |
| 12  | 54    | 26.5  | 0.45 | 0.10 | 0.011   | 0.544     | 70        | 64       | 62       | 2.59    | 12.1      |
| 12  | 55    | 27.6  | 0.49 | 0.04 | 0.011   | 0.495     | 78        | 28       | 58       | 0.74    | 12.1      |
| 12  | 56    | 49.7  | 0.65 | 0.01 | 0.021   | 0.490     | 83        | 56       | 69       | 0.74    | 12.1      |
| 12  | 59    | 34.5  | 0.29 | 0.27 | 0.017   | 0.550     | 30        | 43       | 70       | 8.68    | 12.2      |
| 12  | 60    | 1.6   | 0.98 | 0.00 | 0.001   | 0.568     | NA        | NA       | 0        | 0.20    | 12.1      |
| 12  | 123   | 37.9  | 0.31 | 0.16 | 0.017   | 0.515     | 27        | 65       | 70       | 0.26    | 12.2      |
| 12  | 151   | 42.0  | 0.27 | 0.15 | 0.020   | 0.476     | 38        | 63       | 72       | 0.26    | 12.2      |
| 12  | 618   | 36.7  | 0.58 | 0.06 | 0.014   | 0.496     | 69        | 44       | 69       | 8.68    | 12.1      |

| Pen | HenID | Trans | IN   | Out  | Entropy | Initiator | Order out | Order in | Days out | Between | Community |
|-----|-------|-------|------|------|---------|-----------|-----------|----------|----------|---------|-----------|
| 12  | 619   | 22.0  | 0.49 | 0.12 | 0.008   | 0.465     | 46        | 21       | 68       | 0.06    | 12.2      |
| 12  | 620   | 37.0  | 0.31 | 0.07 | 0.017   | 0.459     | 64        | 50       | 65       | 2.68    | 12.1      |
| 12  | 622   | 29.7  | 0.49 | 0.07 | 0.015   | 0.485     | 71        | 34       | 43       | 0.74    | 12.1      |
| 12  | 623   | 39.2  | 0.18 | 0.10 | 0.018   | 0.478     | 33        | 52       | 72       | 2.68    | 12.2      |
| 12  | 624   | 31.9  | 0.77 | 0.03 | 0.011   | 0.451     | 76        | 26       | 68       | 2.93    | 12.1      |
| 12  | 625   | 43.3  | 0.67 | 0.03 | 0.014   | 0.530     | 34        | 14       | 70       | 8.68    | 12.1      |
| 12  | 626   | 21.1  | 0.44 | 0.04 | 0.010   | 0.484     | 82        | 31       | 58       | 0.74    | 12.1      |
| 12  | 627   | 31.5  | 0.60 | 0.02 | 0.013   | 0.518     | 49        | 25       | 62       | 8.68    | 12.1      |
| 12  | 628   | 14.6  | 0.77 | 0.01 | 0.005   | 0.432     | 80        | 22       | 58       | 2.61    | 12.1      |
| 12  | 629   | 36.5  | 0.19 | 0.17 | 0.019   | 0.483     | 37        | 59       | 67       | 6.09    | 12.2      |
| 12  | 630   | 19.9  | 0.40 | 0.02 | 0.010   | 0.466     | 83        | 24       | 55       | 6.09    | 12.1      |
| 12  | 631   | 36.3  | 0.65 | 0.05 | 0.015   | 0.538     | 49        | 56       | 66       | 0.74    | 12.1      |
| 12  | 632   | 46.7  | 0.39 | 0.21 | 0.017   | 0.499     | 33        | 47       | 69       | 0.74    | 12.2      |
| 12  | 634   | 24.1  | 0.59 | 0.01 | 0.013   | 0.444     | 84        | 21       | 39       | 2.68    | 12.1      |
| 12  | 635   | 23.0  | 0.70 | 0.02 | 0.008   | 0.467     | 79        | 44       | 62       | 3.16    | 12.1      |
| 12  | 637   | 29.6  | 0.59 | 0.00 | 0.015   | 0.408     | 92        | 20       | 16       | 6.09    | 12.1      |
| 12  | 638   | 54.1  | 0.47 | 0.03 | 0.025   | 0.456     | 69        | 54       | 70       | 3.16    | 12.1      |
| 12  | 640   | 29.9  | 0.61 | 0.03 | 0.012   | 0.499     | 72        | 35       | 71       | 3.16    | 12.1      |
| 12  | 641   | 19.1  | 0.53 | 0.03 | 0.009   | 0.492     | 79        | 34       | 55       | 6.09    | 12.1      |
| 12  | 642   | 40.8  | 0.40 | 0.08 | 0.020   | 0.463     | 31        | 57       | 72       | 3.16    | 12.1      |
| 12  | 643   | 69.7  | 0.42 | 0.08 | 0.032   | 0.529     | 33        | 48       | 71       | 6.09    | 12.1      |
| 12  | 645   | 22.5  | 0.68 | 0.02 | 0.008   | 0.546     | 68        | 43       | 61       | 8.37    | 12.1      |
| 12  | 646   | 46.0  | 0.52 | 0.06 | 0.018   | 0.429     | 57        | 55       | 70       | 8.68    | 12.1      |
| 12  | 647   | 40.6  | 0.27 | 0.14 | 0.017   | 0.492     | 34        | 58       | 72       | 0.74    | 12.2      |
| 12  | 648   | 43.4  | 0.30 | 0.08 | 0.021   | 0.541     | 48        | 49       | 65       | 0.74    | 12.1      |
| 12  | 649   | 47.1  | 0.21 | 0.32 | 0.024   | 0.505     | 12        | 72       | 70       | 8.68    | 12.2      |
| 12  | 650   | 23.7  | 0.67 | 0.01 | 0.010   | 0.445     | 71        | 13       | 32       | 3.16    | 12.1      |
| 12  | 651   | 37.0  | 0.38 | 0.06 | 0.016   | 0.537     | 49        | 58       | 72       | 8.68    | 12.1      |
| 12  | 653   | 33.1  | 0.48 | 0.07 | 0.014   | 0.543     | 40        | 26       | 64       | 0.74    | 12.1      |

| Pen | HenID | Trans | IN   | Out  | Entropy | Initiator | Order out | Order in | Days out | Between | Community |
|-----|-------|-------|------|------|---------|-----------|-----------|----------|----------|---------|-----------|
| 12  | 655   | 25.1  | 0.49 | 0.04 | 0.012   | 0.529     | 60        | 16       | 59       | 2.93    | 12.1      |
| 12  | 656   | 36.5  | 0.28 | 0.24 | 0.018   | 0.434     | 19        | 52       | 70       | 0.74    | 12.2      |
| 12  | 658   | 50.3  | 0.24 | 0.34 | 0.024   | 0.429     | 23        | 69       | 71       | 6.09    | 12.2      |
| 12  | 659   | 22.6  | 0.64 | 0.03 | 0.008   | 0.496     | 74        | 29       | 66       | 5.53    | 12.1      |
| 12  | 660   | 41.6  | 0.34 | 0.03 | 0.020   | 0.427     | 75        | 53       | 57       | 3.16    | 12.1      |
| 12  | 661   | 47.9  | 0.35 | 0.15 | 0.023   | 0.513     | 23        | 74       | 70       | 0.74    | 12.2      |
| 12  | 662   | 36.5  | 0.33 | 0.10 | 0.017   | 0.449     | 33        | 47       | 69       | 0.74    | 12.2      |
| 12  | 664   | 62.8  | 0.54 | 0.08 | 0.025   | 0.509     | 57        | 60       | 71       | 6.09    | 12.1      |
| 12  | 665   | 26.0  | 0.61 | 0.02 | 0.010   | 0.449     | 68        | 13       | 66       | 3.16    | 12.1      |
| 12  | 666   | 33.1  | 0.19 | 0.17 | 0.017   | 0.587     | 26        | 61       | 69       | 0.26    | 12.2      |
| 12  | 667   | 54.3  | 0.36 | 0.13 | 0.023   | 0.521     | 27        | 44       | 72       | 6.09    | 12.2      |
| 12  | 668   | 25.1  | 0.48 | 0.07 | 0.011   | 0.533     | 51        | 27       | 67       | 2.68    | 12.1      |
| 12  | 669   | 64.7  | 0.42 | 0.16 | 0.025   | 0.534     | 19        | 45       | 72       | 0.67    | 12.2      |
| 12  | 671   | 21.6  | 0.49 | 0.08 | 0.009   | 0.475     | 51        | 8        | 68       | 2.68    | 12.2      |
| 12  | 672   | 29.2  | 0.62 | 0.03 | 0.012   | 0.509     | 25        | 11       | 69       | 0.74    | 12.1      |
| 12  | 673   | 35.6  | 0.42 | 0.03 | 0.018   | 0.474     | 68        | 43       | 63       | 0.08    | 12.1      |
| 12  | 674   | 38.8  | 0.20 | 0.07 | 0.018   | 0.495     | 60        | 49       | 72       | 0.74    | 12.1      |
| 12  | 676   | 48.4  | 0.39 | 0.08 | 0.021   | 0.530     | 42        | 53       | 69       | 8.68    | 12.2      |
| 12  | 677   | 33.3  | 0.36 | 0.07 | 0.013   | 0.530     | 42        | 44       | 71       | 0.56    | 12.2      |
| 12  | 679   | 45.9  | 0.37 | 0.08 | 0.023   | 0.499     | 48        | 41       | 68       | 3.16    | 12.1      |
| 12  | 681   | 43.4  | 0.26 | 0.14 | 0.019   | 0.467     | 50        | 55       | 70       | 3.16    | 12.2      |
| 12  | 682   | 36.0  | 0.39 | 0.07 | 0.014   | 0.450     | 47        | 28       | 71       | 3.16    | 12.2      |
| 12  | 684   | 35.8  | 0.31 | 0.11 | 0.018   | 0.472     | 69        | 53       | 67       | 3.16    | 12.1      |
| 12  | 685   | 40.7  | 0.25 | 0.04 | 0.018   | 0.480     | 47        | 41       | 70       | 3.16    | 12.1      |
| 12  | 686   | 43.6  | 0.35 | 0.06 | 0.021   | 0.531     | 22        | 17       | 72       | 8.37    | 12.1      |
| 12  | 688   | 34.5  | 0.38 | 0.05 | 0.015   | 0.445     | 52        | 29       | 72       | 0.74    | 12.1      |
| 12  | 690   | 39.8  | 0.27 | 0.18 | 0.018   | 0.534     | 40        | 63       | 72       | 0.74    | 12.2      |
| 12  | 691   | 32.0  | 0.62 | 0.10 | 0.010   | 0.487     | 35        | 40       | 69       | 3.16    | 12.2      |
| 12  | 692   | 36.7  | 0.33 | 0.06 | 0.017   | 0.505     | 59        | 56       | 70       | 3.16    | 12.1      |

| Pen | HenID | Trans | IN   | Out  | Entropy | Initiator | Order out | Order in | Days out | Between | Community |
|-----|-------|-------|------|------|---------|-----------|-----------|----------|----------|---------|-----------|
| 12  | 693   | 41.9  | 0.47 | 0.09 | 0.016   | 0.545     | 36        | 54       | 68       | 3.16    | 12.2      |
| 12  | 694   | 76.6  | 0.25 | 0.19 | 0.034   | 0.561     | 23        | 67       | 72       | 0.74    | 12.2      |
| 12  | 695   | 40.9  | 0.28 | 0.19 | 0.019   | 0.467     | 32        | 60       | 71       | 3.16    | 12.2      |
| 12  | 697   | 63.1  | 0.27 | 0.19 | 0.030   | 0.455     | 27        | 59       | 72       | 8.68    | 12.2      |
| 12  | 698   | 39.2  | 0.55 | 0.15 | 0.015   | 0.490     | 30        | 21       | 70       | 6.09    | 12.2      |
| 12  | 699   | 45.6  | 0.32 | 0.14 | 0.020   | 0.548     | 37        | 64       | 71       | 3.16    | 12.2      |
| 12  | 700   | 55.0  | 0.22 | 0.17 | 0.026   | 0.470     | 31        | 67       | 71       | 3.16    | 12.2      |
| 12  | 702   | 43.9  | 0.23 | 0.15 | 0.019   | 0.544     | 25        | 68       | 72       | 0.74    | 12.2      |
| 12  | 703   | 58.7  | 0.45 | 0.12 | 0.025   | 0.513     | 15        | 45       | 71       | 6.09    | 12.2      |
| 12  | 705   | 51.9  | 0.23 | 0.11 | 0.023   | 0.446     | 19        | 63       | 71       | 6.09    | 12.2      |
| 12  | 706   | 47.3  | 0.41 | 0.09 | 0.024   | 0.537     | 21        | 50       | 69       | 6.09    | 12.1      |
| 12  | 711   | 54.0  | 0.23 | 0.25 | 0.024   | 0.505     | 12        | 49       | 71       | 0.74    | 12.2      |
| 12  | 712   | 31.9  | 0.21 | 0.06 | 0.015   | 0.436     | 28        | 39       | 70       | 0.74    | 12.2      |
| 12  | 934   | 15.0  | 0.78 | 0.01 | 0.005   | 0.466     | 87        | 37       | 45       | 0.22    | 12.1      |
| 13  | 57    | 28.4  | 0.60 | 0.11 | 0.012   | 0.513     | 69        | 39       | 63       | 1.02    | 13.1      |
| 13  | 61    | 19.1  | 0.63 | 0.04 | 0.008   | 0.463     | 73        | 59       | 58       | 1.22    | 13.1      |
| 13  | 62    | 71.7  | 0.43 | 0.18 | 0.037   | 0.468     | 48        | 31       | 72       | 1.31    | 13.2      |
| 13  | 63    | 64.2  | 0.29 | 0.29 | 0.034   | 0.483     | 21        | 70       | 71       | 2.82    | 13.2      |
| 13  | 65    | 34.8  | 0.26 | 0.39 | 0.020   | 0.513     | 55        | 48       | 72       | 0.61    | 13.2      |
| 13  | 66    | 29.6  | 0.63 | 0.06 | 0.012   | 0.487     | 63        | 18       | 69       | 0.67    | 13.1      |
| 13  | 67    | 38.5  | 0.31 | 0.24 | 0.021   | 0.570     | 45        | 34       | 72       | 0.87    | 13.2      |
| 13  | 68    | 67.0  | 0.42 | 0.16 | 0.027   | 0.500     | 33        | 64       | 72       | 1.31    | 13.2      |
| 13  | 69    | 52.2  | 0.14 | 0.39 | 0.030   | 0.483     | 41        | 65       | 72       | 1.31    | 13.2      |
| 13  | 70    | 10.2  | 0.85 | 0.01 | 0.003   | 0.461     | 85        | 14       | 44       | 0.50    | 13.1      |
| 13  | 71    | 57.8  | 0.30 | 0.09 | 0.029   | 0.514     | 56        | 64       | 69       | 3.34    | 13.1      |
| 13  | 72    | 3.3   | 0.98 | 0.00 | 0.003   | 0.489     | NA        | NA       | 0        | 0.12    | 13.1      |
| 13  | 73    | 14.0  | 0.93 | 0.00 | 0.005   | 0.481     | 93        | 31       | 9        | 3.14    | 13.1      |
| 13  | 74    | 39.3  | 0.39 | 0.24 | 0.021   | 0.489     | 46        | 51       | 71       | 3.34    | 13.2      |
| 13  | 75    | 33.9  | 0.56 | 0.14 | 0.015   | 0.521     | 62        | 22       | 71       | 2.82    | 13.1      |



| Pen | HenID | Trans | IN   | Out  | Entropy | Initiator | Order out | Order in | Days out | Between | Community |
|-----|-------|-------|------|------|---------|-----------|-----------|----------|----------|---------|-----------|
| 13  | 76    | 74.2  | 0.35 | 0.32 | 0.037   | 0.576     | 33        | 66       | 72       | 1.31    | 13.2      |
| 13  | 78    | 64.9  | 0.34 | 0.06 | 0.033   | 0.528     | 41        | 67       | 71       | 1.31    | 13.1      |
| 13  | 79    | 33.5  | 0.48 | 0.10 | 0.014   | 0.452     | 66        | 78       | 69       | 3.15    | 13.1      |
| 13  | 80    | 5.6   | 0.93 | 0.01 | 0.002   | 0.444     | 93        | 52       | 38       | 0.12    | 13.1      |
| 13  | 81    | 41.7  | 0.19 | 0.28 | 0.022   | 0.568     | 41        | 54       | 72       | 0.43    | 13.2      |
| 13  | 83    | 15.1  | 0.64 | 0.02 | 0.007   | 0.420     | 61        | 3        | 48       | 0.87    | 13.1      |
| 13  | 84    | 1.0   | 1.00 | 0.00 | 0.000   | NA        | NA        | NA       | 0        | 0.00    | 13.3      |
| 13  | 85    | 22.1  | 0.73 | 0.14 | 0.008   | 0.552     | 79        | 64       | 54       | 2.82    | 13.2      |
| 13  | 86    | 20.4  | 0.30 | 0.13 | 0.010   | 0.490     | 38        | 35       | 60       | 1.31    | 13.1      |
| 13  | 88    | 51.2  | 0.36 | 0.17 | 0.027   | 0.550     | 35        | 39       | 71       | 1.31    | 13.2      |
| 13  | 89    | 5.2   | 0.92 | 0.01 | 0.003   | 0.493     | 77        | 5        | 24       | 0.30    | 13.1      |
| 13  | 90    | 28.7  | 0.46 | 0.02 | 0.015   | 0.377     | 89        | 33       | 57       | 1.31    | 13.1      |
| 13  | 104   | 35.0  | 0.56 | 0.06 | 0.012   | 0.461     | 62        | 53       | 70       | 1.31    | 13.1      |
| 13  | 113   | 40.7  | 0.23 | 0.25 | 0.025   | 0.538     | 44        | 41       | 72       | 1.31    | 13.2      |
| 13  | 153   | 17.8  | 0.77 | 0.05 | 0.005   | 0.449     | 84        | 34       | 71       | 2.44    | 13.1      |
| 13  | 720   | 20.1  | 0.78 | 0.09 | 0.006   | 0.574     | 48        | 8        | 69       | 0.87    | 13.2      |
| 13  | 721   | 1.0   | 1.00 | 0.00 | 0.000   | NA        | NA        | NA       | 0        | 0.00    | 13.4      |
| 13  | 723   | 87.0  | 0.29 | 0.37 | 0.051   | 0.572     | 45        | 67       | 72       | 1.31    | 13.2      |
| 13  | 725   | 15.2  | 0.82 | 0.02 | 0.005   | 0.540     | 50        | 9        | 60       | 2.67    | 13.1      |
| 13  | 726   | 43.8  | 0.42 | 0.07 | 0.022   | 0.549     | 54        | 24       | 71       | 3.34    | 13.1      |
| 13  | 727   | 36.5  | 0.38 | 0.22 | 0.020   | 0.568     | 48        | 37       | 67       | 3.34    | 13.2      |
| 13  | 728   | 69.7  | 0.21 | 0.27 | 0.036   | 0.564     | 27        | 72       | 72       | 1.31    | 13.2      |
| 13  | 729   | 45.9  | 0.52 | 0.05 | 0.021   | 0.540     | 41        | 54       | 71       | 1.31    | 13.1      |
| 13  | 731   | 68.4  | 0.18 | 0.32 | 0.036   | 0.568     | 33        | 71       | 72       | 1.31    | 13.2      |
| 13  | 732   | 36.1  | 0.35 | 0.13 | 0.018   | 0.547     | 37        | 36       | 72       | 3.34    | 13.2      |
| 13  | 733   | 40.7  | 0.46 | 0.08 | 0.018   | 0.547     | 72        | 42       | 70       | 1.31    | 13.1      |
| 13  | 734   | 30.2  | 0.39 | 0.05 | 0.014   | 0.540     | 31        | 43       | 70       | 2.85    | 13.1      |
| 13  | 735   | 1.0   | 1.00 | 0.00 | 0.000   | NA        | NA        | NA       | 0        | 0.00    | 13.5      |
| 13  | 738   | 57.0  | 0.53 | 0.14 | 0.026   | 0.549     | 40        | 45       | 71       | 3.34    | 13.2      |

| Pen | HenID | Trans | IN   | Out  | Entropy | Initiator | Order out | Order in | Days out | Between | Community |
|-----|-------|-------|------|------|---------|-----------|-----------|----------|----------|---------|-----------|
| 13  | 740   | 52.6  | 0.40 | 0.25 | 0.025   | 0.548     | 37        | 43       | 72       | 3.34    | 13.2      |
| 13  | 741   | 50.0  | 0.45 | 0.03 | 0.025   | 0.525     | 63        | 46       | 66       | 3.34    | 13.1      |
| 13  | 742   | 62.5  | 0.30 | 0.22 | 0.032   | 0.542     | 42        | 70       | 72       | 3.34    | 13.2      |
| 13  | 744   | 65.2  | 0.28 | 0.18 | 0.031   | 0.542     | 28        | 60       | 72       | 3.34    | 13.2      |
| 13  | 745   | 63.2  | 0.23 | 0.14 | 0.034   | 0.533     | 22        | 46       | 72       | 0.84    | 13.2      |
| 13  | 746   | 50.5  | 0.62 | 0.05 | 0.020   | 0.513     | 68        | 55       | 71       | 0.84    | 13.1      |
| 13  | 747   | 23.8  | 0.51 | 0.06 | 0.012   | 0.488     | 72        | 15       | 49       | 2.85    | 13.1      |
| 13  | 748   | 45.2  | 0.43 | 0.10 | 0.021   | 0.535     | 39        | 54       | 70       | 3.34    | 13.1      |
| 13  | 750   | 73.8  | 0.32 | 0.29 | 0.038   | 0.519     | 48        | 70       | 72       | 3.34    | 13.2      |
| 13  | 752   | 50.0  | 0.45 | 0.21 | 0.026   | 0.527     | 51        | 46       | 70       | 1.31    | 13.2      |
| 13  | 753   | 39.3  | 0.36 | 0.07 | 0.019   | 0.499     | 35        | 38       | 70       | 1.31    | 13.1      |
| 13  | 754   | 29.8  | 0.50 | 0.07 | 0.014   | 0.503     | 80        | 61       | 56       | 3.34    | 13.1      |
| 13  | 758   | 41.0  | 0.20 | 0.33 | 0.024   | 0.527     | 39        | 56       | 72       | 2.36    | 13.2      |
| 13  | 759   | 58.8  | 0.31 | 0.23 | 0.029   | 0.530     | 26        | 66       | 72       | 3.34    | 13.2      |
| 13  | 760   | 75.6  | 0.36 | 0.19 | 0.035   | 0.484     | 16        | 71       | 72       | 3.34    | 13.2      |
| 13  | 761   | 43.8  | 0.30 | 0.09 | 0.021   | 0.498     | 38        | 51       | 71       | 1.31    | 13.2      |
| 13  | 762   | 85.9  | 0.23 | 0.22 | 0.048   | 0.527     | 28        | 66       | 72       | 1.31    | 13.2      |
| 13  | 763   | 35.6  | 0.43 | 0.29 | 0.016   | 0.531     | 48        | 60       | 71       | 1.02    | 13.2      |
| 13  | 764   | 39.8  | 0.47 | 0.05 | 0.019   | 0.478     | 69        | 50       | 71       | 3.34    | 13.1      |
| 13  | 765   | 41.7  | 0.53 | 0.04 | 0.019   | 0.478     | 66        | 23       | 72       | 3.34    | 13.1      |
| 13  | 766   | 21.6  | 0.53 | 0.01 | 0.010   | 0.458     | 76        | 17       | 68       | 0.84    | 13.1      |
| 13  | 767   | 28.6  | 0.61 | 0.02 | 0.013   | 0.469     | 72        | 15       | 55       | 3.34    | 13.1      |
| 13  | 768   | 41.6  | 0.25 | 0.21 | 0.025   | 0.518     | 43        | 38       | 71       | 0.84    | 13.2      |
| 13  | 769   | 24.7  | 0.70 | 0.06 | 0.008   | 0.532     | 80        | 29       | 71       | 2.82    | 13.1      |
| 13  | 770   | 67.7  | 0.39 | 0.08 | 0.033   | 0.508     | 41        | 40       | 70       | 1.31    | 13.1      |
| 13  | 772   | 46.3  | 0.30 | 0.06 | 0.023   | 0.468     | 32        | 48       | 72       | 3.34    | 13.1      |
| 13  | 774   | 47.0  | 0.33 | 0.22 | 0.021   | 0.509     | 30        | 68       | 72       | 1.31    | 13.2      |
| 13  | 776   | 47.0  | 0.25 | 0.05 | 0.024   | 0.475     | 43        | 39       | 71       | 1.31    | 13.1      |
| 13  | 777   | 54.7  | 0.50 | 0.12 | 0.024   | 0.495     | 44        | 48       | 71       | 2.85    | 13.2      |

| Pen | HenID | Trans | IN   | Out  | Entropy | Initiator | Order out | Order in | Days out | Between | Community |
|-----|-------|-------|------|------|---------|-----------|-----------|----------|----------|---------|-----------|
| 13  | 779   | 39.9  | 0.54 | 0.01 | 0.020   | 0.457     | 54        | 27       | 56       | 2.82    | 13.1      |
| 13  | 780   | 57.9  | 0.44 | 0.04 | 0.027   | 0.475     | 53        | 59       | 71       | 1.31    | 13.1      |
| 13  | 781   | 20.6  | 0.81 | 0.04 | 0.005   | 0.473     | 80        | 28       | 70       | 2.60    | 13.1      |
| 13  | 782   | 34.6  | 0.27 | 0.03 | 0.017   | 0.484     | 38        | 46       | 70       | 3.34    | 13.1      |
| 13  | 784   | 63.0  | 0.39 | 0.06 | 0.030   | 0.478     | 44        | 54       | 72       | 3.34    | 13.1      |
| 13  | 785   | 50.7  | 0.53 | 0.04 | 0.023   | 0.453     | 69        | 30       | 69       | 2.85    | 13.1      |
| 13  | 786   | 47.3  | 0.30 | 0.07 | 0.022   | 0.486     | 31        | 64       | 72       | 1.31    | 13.1      |
| 13  | 789   | 57.8  | 0.30 | 0.28 | 0.033   | 0.493     | 37        | 45       | 72       | 1.09    | 13.2      |
| 13  | 790   | 69.5  | 0.24 | 0.22 | 0.037   | 0.494     | 48        | 59       | 72       | 0.87    | 13.2      |
| 13  | 791   | 45.2  | 0.22 | 0.12 | 0.023   | 0.481     | 40        | 72       | 71       | 1.31    | 13.2      |
| 13  | 792   | 69.3  | 0.20 | 0.38 | 0.044   | 0.489     | 49        | 49       | 72       | 1.31    | 13.2      |
| 13  | 793   | 38.8  | 0.39 | 0.13 | 0.018   | 0.466     | 36        | 30       | 72       | 2.36    | 13.2      |
| 13  | 795   | 61.0  | 0.62 | 0.03 | 0.025   | 0.443     | 74        | 64       | 70       | 2.82    | 13.1      |
| 13  | 796   | 20.0  | 0.82 | 0.01 | 0.007   | 0.426     | 79        | 28       | 52       | 2.67    | 13.1      |
| 13  | 797   | 70.4  | 0.25 | 0.19 | 0.036   | 0.459     | 26        | 65       | 72       | 3.34    | 13.2      |
| 13  | 798   | 42.5  | 0.24 | 0.09 | 0.021   | 0.461     | 33        | 41       | 70       | 1.31    | 13.1      |
| 13  | 799   | 19.4  | 0.91 | 0.00 | 0.007   | 0.418     | 93        | 23       | 1        | 2.82    | 13.1      |
| 13  | 800   | 20.8  | 0.67 | 0.13 | 0.008   | 0.468     | 85        | 56       | 65       | 2.82    | 13.1      |
| 13  | 801   | 66.2  | 0.46 | 0.07 | 0.033   | 0.448     | 48        | 34       | 70       | 3.34    | 13.1      |
| 13  | 802   | 44.1  | 0.39 | 0.12 | 0.024   | 0.447     | 27        | 45       | 67       | 1.31    | 13.1      |
| 13  | 805   | 66.9  | 0.30 | 0.30 | 0.036   | 0.491     | 35        | 62       | 72       | 1.31    | 13.2      |
| 13  | 806   | 12.7  | 0.76 | 0.05 | 0.004   | 0.443     | 73        | 17       | 65       | 0.59    | 13.1      |
| 13  | 810   | 52.5  | 0.39 | 0.08 | 0.024   | 0.447     | 34        | 48       | 70       | 3.34    | 13.1      |
| 13  | 811   | 29.1  | 0.67 | 0.08 | 0.009   | 0.476     | 82        | 56       | 67       | 3.34    | 13.1      |
| 13  | 812   | 82.9  | 0.21 | 0.29 | 0.043   | 0.477     | 20        | 71       | 72       | 1.31    | 13.2      |
| 13  | 813   | 57.5  | 0.35 | 0.12 | 0.029   | 0.451     | 34        | 69       | 70       | 3.34    | 13.2      |
| 13  | 814   | 36.7  | 0.47 | 0.02 | 0.017   | 0.423     | 66        | 29       | 70       | 1.31    | 13.1      |
| 13  | 815   | 40.7  | 0.47 | 0.09 | 0.019   | 0.439     | 37        | 35       | 72       | 3.34    | 13.1      |
| 13  | 817   | 18.0  | 0.61 | 0.11 | 0.014   | 0.453     | 41        | 43       | 35       | 2.88    | 13.2      |

| Pen | HenID | Trans | IN   | Out  | Entropy | Initiator | Order out | Order in | Days out | Between | Community |
|-----|-------|-------|------|------|---------|-----------|-----------|----------|----------|---------|-----------|
| 13  | 819   | 45.6  | 0.33 | 0.15 | 0.022   | 0.444     | 41        | 41       | 72       | 1.31    | 13.1      |
| 13  | 821   | 39.6  | 0.56 | 0.04 | 0.017   | 0.418     | 40        | 40       | 71       | 3.07    | 13.1      |
| 13  | 822   | 42.0  | 0.46 | 0.03 | 0.020   | 0.419     | 72        | 47       | 63       | 3.34    | 13.1      |
| 13  | 823   | 30.6  | 0.66 | 0.06 | 0.014   | 0.415     | 53        | 8        | 59       | 2.85    | 13.1      |
| 14  | 91    | 48.6  | 0.38 | 0.31 | 0.022   | 0.532     | 8         | 57       | 72       | 2.39    | 14.1      |
| 14  | 92    | 5.4   | 0.88 | 0.03 | 0.003   | 0.459     | 65        | 2        | 25       | 1.25    | 14.3      |
| 14  | 93    | 35.3  | 0.62 | 0.08 | 0.013   | 0.499     | 40        | 25       | 67       | 2.79    | 14.1      |
| 14  | 94    | 31.6  | 0.56 | 0.02 | 0.013   | 0.527     | 55        | 34       | 68       | 3.17    | 14.3      |
| 14  | 95    | 44.2  | 0.36 | 0.45 | 0.027   | 0.513     | 44        | 30       | 72       | 3.17    | 14.2      |
| 14  | 97    | 1.0   | 1.00 | 0.00 | 0.001   | 0.625     | NA        | NA       | 0        | 0.00    | 14.1      |
| 14  | 98    | 1.0   | 1.00 | 0.00 | 0.000   | NA        | NA        | NA       | 0        | 0.00    | 14.4      |
| 14  | 99    | 41.6  | 0.40 | 0.50 | 0.023   | 0.561     | 47        | 24       | 72       | 3.04    | 14.2      |
| 14  | 100   | 77.8  | 0.29 | 0.30 | 0.037   | 0.496     | 14        | 59       | 72       | 1.74    | 14.1      |
| 14  | 101   | 9.2   | 0.90 | 0.00 | 0.004   | 0.446     | 71        | 10       | 17       | 1.77    | 14.3      |
| 14  | 102   | 51.6  | 0.33 | 0.16 | 0.025   | 0.516     | 28        | 57       | 72       | 2.24    | 14.1      |
| 14  | 103   | 47.8  | 0.28 | 0.06 | 0.023   | 0.469     | 29        | 38       | 72       | 2.88    | 14.1      |
| 14  | 105   | 28.6  | 0.76 | 0.04 | 0.010   | 0.434     | 53        | 15       | 53       | 2.02    | 14.3      |
| 14  | 106   | 58.8  | 0.41 | 0.20 | 0.025   | 0.559     | 18        | 52       | 72       | 2.24    | 14.1      |
| 14  | 107   | 6.6   | 0.91 | 0.01 | 0.003   | 0.399     | 71        | 5        | 16       | 1.45    | 14.3      |
| 14  | 108   | 69.0  | 0.39 | 0.07 | 0.035   | 0.542     | 35        | 47       | 71       | 3.17    | 14.1      |
| 14  | 109   | 78.8  | 0.37 | 0.16 | 0.032   | 0.479     | 25        | 52       | 72       | 2.64    | 14.1      |
| 14  | 110   | 21.8  | 0.48 | 0.13 | 0.013   | 0.505     | 74        | 30       | 37       | 2.58    | 14.2      |
| 14  | 111   | 24.0  | 0.58 | 0.08 | 0.010   | 0.545     | 42        | 24       | 63       | 1.56    | 14.1      |
| 14  | 112   | 43.6  | 0.33 | 0.12 | 0.020   | 0.475     | 18        | 35       | 72       | 3.17    | 14.1      |
| 14  | 114   | 56.1  | 0.51 | 0.21 | 0.024   | 0.477     | 22        | 43       | 68       | 2.29    | 14.1      |
| 14  | 115   | 41.8  | 0.47 | 0.28 | 0.017   | 0.552     | 20        | 31       | 71       | 1.36    | 14.1      |
| 14  | 117   | 9.3   | 0.86 | 0.03 | 0.003   | 0.498     | 69        | 17       | 52       | 1.90    | 14.3      |
| 14  | 119   | 3.4   | 0.95 | 0.00 | 0.002   | 0.496     | 69        | 7        | 13       | 0.22    | 14.3      |
| 14  | 121   | 52.3  | 0.30 | 0.32 | 0.025   | 0.484     | 6         | 54       | 72       | 1.42    | 14.1      |

| Pen | HenID | Trans | IN   | Out  | Entropy | Initiator | Order out | Order in | Days out | Between | Community |
|-----|-------|-------|------|------|---------|-----------|-----------|----------|----------|---------|-----------|
| 14  | 122   | 32.1  | 0.45 | 0.46 | 0.019   | 0.535     | 55        | 18       | 72       | 2.96    | 14.2      |
| 14  | 124   | 35.1  | 0.25 | 0.72 | 0.018   | 0.534     | 53        | 43       | 72       | 2.24    | 14.2      |
| 14  | 150   | 31.1  | 0.41 | 0.03 | 0.018   | 0.435     | 72        | 18       | 23       | 3.17    | 14.2      |
| 14  | 152   | 37.6  | 0.47 | 0.42 | 0.020   | 0.567     | 59        | 27       | 72       | 2.88    | 14.2      |
| 14  | 154   | 55.6  | 0.56 | 0.20 | 0.029   | 0.484     | 50        | 9        | 72       | 3.17    | 14.2      |
| 14  | 836   | 18.6  | 0.63 | 0.02 | 0.008   | 0.401     | 73        | 33       | 51       | 2.81    | 14.3      |
| 14  | 839   | 11.6  | 0.90 | 0.03 | 0.003   | 0.496     | 66        | 19       | 50       | 1.04    | 14.3      |
| 14  | 840   | 52.5  | 0.51 | 0.12 | 0.024   | 0.521     | 21        | 41       | 66       | 2.58    | 14.1      |
| 14  | 841   | 23.2  | 0.67 | 0.04 | 0.010   | 0.429     | 68        | 32       | 50       | 2.26    | 14.3      |
| 14  | 843   | 6.8   | 0.93 | 0.00 | 0.003   | 0.405     | NA        | NA       | 0        | 0.39    | 14.2      |
| 14  | 844   | 25.2  | 0.54 | 0.22 | 0.014   | 0.522     | 54        | 8        | 61       | 3.17    | 14.2      |
| 14  | 845   | 4.6   | 0.87 | 0.00 | 0.002   | 0.401     | NA        | NA       | 1        | 0.46    | 14.3      |
| 14  | 846   | 7.2   | 0.77 | 0.04 | 0.004   | 0.520     | 43        | 9        | 35       | 0.82    | 14.2      |
| 14  | 847   | 37.5  | 0.38 | 0.33 | 0.023   | 0.431     | 51        | 10       | 70       | 3.17    | 14.2      |
| 14  | 848   | 52.2  | 0.37 | 0.09 | 0.024   | 0.516     | 26        | 49       | 67       | 3.17    | 14.1      |
| 14  | 849   | 28.6  | 0.71 | 0.11 | 0.012   | 0.490     | 73        | 24       | 34       | 2.05    | 14.2      |
| 14  | 850   | 6.2   | 0.83 | 0.00 | 0.003   | 0.480     | 84        | 17       | 4        | 0.60    | 14.3      |
| 14  | 851   | 1.0   | 1.00 | 0.00 | 0.000   | NA        | NA        | NA       | 0        | 0.00    | 14.5      |
| 14  | 852   | 30.8  | 0.51 | 0.27 | 0.016   | 0.470     | 63        | 27       | 70       | 2.79    | 14.2      |
| 14  | 853   | 29.0  | 0.68 | 0.17 | 0.012   | 0.439     | 72        | 35       | 63       | 3.17    | 14.2      |
| 14  | 854   | 38.2  | 0.35 | 0.23 | 0.018   | 0.544     | 21        | 38       | 72       | 1.21    | 14.1      |
| 14  | 855   | 31.1  | 0.31 | 0.16 | 0.016   | 0.555     | 15        | 37       | 70       | 2.39    | 14.1      |
| 14  | 856   | 27.4  | 0.48 | 0.33 | 0.014   | 0.468     | 53        | 14       | 71       | 1.39    | 14.2      |
| 14  | 858   | 35.6  | 0.38 | 0.32 | 0.022   | 0.466     | 64        | 44       | 58       | 2.28    | 14.2      |
| 14  | 859   | 73.8  | 0.32 | 0.16 | 0.033   | 0.476     | 14        | 58       | 72       | 3.17    | 14.1      |
| 14  | 860   | 31.8  | 0.44 | 0.36 | 0.016   | 0.544     | 48        | 21       | 62       | 3.17    | 14.2      |
| 14  | 861   | 44.4  | 0.60 | 0.07 | 0.018   | 0.452     | 17        | 52       | 64       | 3.17    | 14.1      |
| 14  | 862   | 43.3  | 0.67 | 0.11 | 0.014   | 0.478     | 21        | 35       | 66       | 3.17    | 14.1      |
| 14  | 863   | 59.6  | 0.43 | 0.22 | 0.022   | 0.551     | 33        | 55       | 72       | 1.41    | 14.1      |

| Pen | HenID | Trans | IN   | Out  | Entropy | Initiator | Order out | Order in | Days out | Between | Community |
|-----|-------|-------|------|------|---------|-----------|-----------|----------|----------|---------|-----------|
| 14  | 865   | 45.8  | 0.61 | 0.12 | 0.016   | 0.517     | 47        | 36       | 72       | 2.39    | 14.1      |
| 14  | 867   | 26.3  | 0.70 | 0.04 | 0.010   | 0.505     | 39        | 26       | 68       | 2.24    | 14.3      |
| 14  | 868   | 70.2  | 0.28 | 0.19 | 0.034   | 0.514     | 7         | 58       | 72       | 97.68   | 14.1      |
| 14  | 869   | 34.5  | 0.44 | 0.44 | 0.016   | 0.512     | 52        | 34       | 71       | 1.68    | 14.2      |
| 14  | 870   | 33.3  | 0.62 | 0.01 | 0.013   | 0.471     | 61        | 45       | 65       | 2.24    | 14.3      |
| 14  | 871   | 78.2  | 0.45 | 0.08 | 0.034   | 0.506     | 25        | 58       | 72       | 3.17    | 14.1      |
| 14  | 872   | 33.6  | 0.39 | 0.05 | 0.016   | 0.563     | 39        | 32       | 58       | 2.24    | 14.1      |
| 14  | 873   | 19.9  | 0.29 | 0.05 | 0.010   | 0.445     | 31        | 25       | 66       | 1.29    | 14.3      |
| 14  | 874   | 53.5  | 0.49 | 0.07 | 0.021   | 0.462     | 23        | 39       | 71       | 2.24    | 14.1      |
| 14  | 875   | 50.0  | 0.52 | 0.02 | 0.022   | 0.426     | 50        | 45       | 70       | 3.17    | 14.3      |
| 14  | 876   | 33.7  | 0.39 | 0.30 | 0.020   | 0.536     | 66        | 12       | 63       | 3.17    | 14.2      |
| 14  | 878   | 41.1  | 0.34 | 0.08 | 0.019   | 0.489     | 16        | 48       | 72       | 2.58    | 14.1      |
| 14  | 879   | 45.6  | 0.50 | 0.12 | 0.024   | 0.511     | 53        | 8        | 62       | 2.95    | 14.2      |
| 14  | 880   | 46.5  | 0.53 | 0.33 | 0.024   | 0.495     | 49        | 20       | 72       | 2.88    | 14.2      |
| 14  | 881   | 35.6  | 0.72 | 0.04 | 0.011   | 0.458     | 63        | 55       | 70       | 2.58    | 14.3      |
| 14  | 882   | 45.0  | 0.42 | 0.10 | 0.019   | 0.540     | 44        | 58       | 71       | 3.17    | 14.1      |
| 14  | 884   | 22.4  | 0.60 | 0.02 | 0.012   | 0.427     | 43        | 6        | 26       | 3.17    | 14.2      |
| 14  | 885   | 10.9  | 0.57 | 0.00 | 0.006   | 0.448     | NA        | NA       | 3        | 2.22    | 14.2      |
| 14  | 886   | 39.1  | 0.54 | 0.07 | 0.014   | 0.530     | 26        | 37       | 70       | 2.79    | 14.1      |
| 14  | 888   | 33.5  | 0.38 | 0.27 | 0.020   | 0.549     | 60        | 29       | 62       | 3.17    | 14.2      |
| 14  | 891   | 48.0  | 0.48 | 0.06 | 0.020   | 0.530     | 24        | 46       | 72       | 2.24    | 14.1      |
| 14  | 892   | 23.5  | 0.29 | 0.31 | 0.015   | 0.485     | 61        | 30       | 70       | 3.17    | 14.2      |
| 14  | 893   | 63.0  | 0.25 | 0.09 | 0.031   | 0.443     | 53        | 63       | 72       | 3.17    | 14.1      |
| 14  | 894   | 4.6   | 0.86 | 0.02 | 0.003   | 0.575     | 79        | 31       | 6        | 0.65    | 14.2      |
| 14  | 895   | 52.2  | 0.33 | 0.05 | 0.024   | 0.464     | 26        | 36       | 71       | 3.17    | 14.1      |
| 14  | 896   | 59.1  | 0.38 | 0.13 | 0.026   | 0.486     | 18        | 56       | 72       | 3.17    | 14.1      |
| 14  | 898   | 42.0  | 0.33 | 0.07 | 0.018   | 0.532     | 37        | 48       | 72       | 3.17    | 14.1      |
| 14  | 899   | 53.0  | 0.36 | 0.12 | 0.023   | 0.497     | 23        | 64       | 71       | 3.17    | 14.1      |
| 14  | 900   | 50.8  | 0.42 | 0.22 | 0.031   | 0.455     | 55        | 20       | 65       | 3.17    | 14.2      |

| Pen | HenID | Trans | IN   | Out  | Entropy | Initiator | Order out | Order in | Days out | Between | Community |
|-----|-------|-------|------|------|---------|-----------|-----------|----------|----------|---------|-----------|
| 14  | 902   | 37.2  | 0.52 | 0.27 | 0.021   | 0.528     | 56        | 26       | 67       | 2.24    | 14.2      |
| 14  | 904   | 24.5  | 0.47 | 0.41 | 0.013   | 0.539     | 51        | 31       | 68       | 1.97    | 14.2      |
| 14  | 905   | 76.8  | 0.35 | 0.26 | 0.037   | 0.461     | 7         | 59       | 72       | 3.17    | 14.1      |
| 14  | 907   | 46.2  | 0.41 | 0.06 | 0.022   | 0.480     | 45        | 35       | 72       | 2.24    | 14.1      |
| 14  | 909   | 35.5  | 0.63 | 0.03 | 0.017   | 0.425     | 65        | 16       | 16       | 2.26    | 14.2      |
| 14  | 910   | 17.1  | 0.58 | 0.05 | 0.006   | 0.496     | 46        | 16       | 67       | 2.95    | 14.1      |
| 14  | 912   | 43.8  | 0.45 | 0.05 | 0.019   | 0.542     | 31        | 37       | 72       | 3.17    | 14.1      |
| 14  | 913   | 47.8  | 0.45 | 0.28 | 0.026   | 0.525     | 58        | 33       | 71       | 3.17    | 14.2      |
| 14  | 917   | 55.7  | 0.31 | 0.08 | 0.026   | 0.519     | 15        | 33       | 72       | 3.17    | 14.1      |
| 14  | 918   | 53.1  | 0.29 | 0.14 | 0.024   | 0.542     | 33        | 61       | 72       | 2.64    | 14.1      |
| 14  | 919   | 1.0   | 1.00 | 0.00 | 0.000   | NA        | NA        | NA       | 0        | 0.00    | 14.6      |
| 14  | 921   | 61.4  | 0.32 | 0.10 | 0.027   | 0.524     | 21        | 49       | 72       | 103.17  | 14.1      |
| 14  | 924   | 34.3  | 0.37 | 0.06 | 0.014   | 0.529     | 35        | 33       | 72       | 3.17    | 14.1      |
| 14  | 926   | 48.7  | 0.30 | 0.33 | 0.032   | 0.457     | 46        | 23       | 65       | 3.17    | 14.2      |
| 14  | 928   | 31.8  | 0.29 | 0.39 | 0.020   | 0.535     | 40        | 21       | 67       | 1.37    | 14.2      |
| 14  | 929   | 28.6  | 0.31 | 0.15 | 0.017   | 0.424     | 59        | 11       | 51       | 2.24    | 14.2      |
| 14  | 930   | 45.9  | 0.49 | 0.27 | 0.025   | 0.473     | 49        | 17       | 69       | 2.58    | 14.2      |
| 14  | 931   | 23.8  | 0.41 | 0.30 | 0.014   | 0.427     | 45        | 11       | 70       | 2.14    | 14.2      |
| 14  | 932   | 35.6  | 0.32 | 0.41 | 0.020   | 0.570     | 40        | 47       | 63       | 2.42    | 14.2      |
| 14  | 933   | 63.4  | 0.31 | 0.62 | 0.036   | 0.541     | 45        | 45       | 72       | 3.17    | 14.2      |
| 14  | 935   | 81.8  | 0.46 | 0.24 | 0.033   | 0.523     | 23        | 62       | 71       | 2.64    | 14.1      |
