# Supplementary material for: Similarity in Temporal Movement Patterns in Laying Hens Increases with Time and Social Association
Source: MDPI journal article supplement (doi:10.3390/ani12050555), 2022-02-23
Supplement: s1 [file s1]

**S3 Table:** Summary table of the cluster characteristics per pen.

| Variable                                      | Cluster | Pen 11          |        |           | Pen 12          |        |            | Pen 13          |        |           | Pen 14          |        |           |
|-----------------------------------------------|---------|-----------------|--------|-----------|-----------------|--------|------------|-----------------|--------|-----------|-----------------|--------|-----------|
|                                               |         | mean (sd)       | median | range     | mean            | median | range      | mean            | median | range     | mean            | median | range     |
| total number of transitions                   | 1       | 13.85 (14.47)   | 9      | 1; 91     | 9.04 (14.87)    | 1      | 1; 90      | 55.63 (28.57)   | 51     | 1; 159    | 45.07 (24.58)   | 41     | 1; 202    |
|                                               | 2       | 50.16 (24.47)   | 47     | 1; 155    | 27.61 (19.16)   | 25     | 1; 103     | 38.60 (24.24)   | 35     | 1; 154    | 7.10 (10.63)    | 3      | 1; 79     |
|                                               | 3       | 50.73 (25.46)   | 48     | 1; 152    | 36.99 (20.74)   | 34     | 1; 176     | 51.12 (25.79)   | 48     | 1; 160    | 28.68 (23.15)   | 24     | 1; 140    |
|                                               | 4       | 36.23 (24.24)   | 31     | 1; 145    | 43.78 (21.74)   | 41     | 1; 158     | 15.44 (18.12)   | 9      | 1; 130    | 44.40 (24.24)   | 41     | 1; 173    |
| total time spent inside [min]                 | 1       | 311.80 (137.75) | 371.25 | 0; 525    | 364.95 (112.58) | 410    | 71.27; 525 | 89.49 (86.44)   | 68.44  | 0; 470    | 154.82 (88.17)  | 137.4  | 0; 484.65 |
|                                               | 2       | 110.73 (67.69)  | 94.8   | 0; 500    | 240.18 (123.94) | 231.84 | 0; 525     | 203.04 (110.19) | 184.65 | 0; 505    | 358.22 (114.81) | 399.58 | 0; 525    |
|                                               | 3       | 146.25 (84.87)  | 128.63 | 0; 514.23 | 178.62 (97.10)  | 160.82 | 0; 515     | 122.69 (83.45)  | 102.43 | 0; 495.48 | 238.90 (121.51) | 235.5  | 0; 524.7  |
|                                               | 4       | 220.32 (117.28) | 212.78 | 0; 525    | 126.86 (73.43)  | 110.38 | 0; 474.82  | 307.49 (144.33) | 366.92 | 0; 525    | 119.93 (72.80)  | 106.12 | 0; 459.15 |
| total time spent in WG [min]                  | 1       | 55.24 (68.64)   | 27.7   | 0; 317.02 | 48.79 (80.55)   | 0      | 0; 312.55  | 128.50 (68.95)  | 123.68 | 0; 364.92 | 148.30 (87.65)  | 142.58 | 0; 398.2  |
|                                               | 2       | 94.87 (75.51)   | 82.79  | 0; 405.83 | 147.30 (92.15)  | 152.48 | 0; 384.43  | 151.25 (85.26)  | 152.07 | 0; 483.1  | 41.88 (68.20)   | 8.95   | 0; 348.5  |
|                                               | 3       | 132.188 (78.29) | 127.82 | 0; 422.47 | 195.98 (84.14)  | 201.03 | 0; 417.02  | 152.15 (75.36)  | 149.83 | 0; 392.03 | 114.05 (90.25)  | 93.57  | 0; 444.1  |
|                                               | 4       | 124.18 (82.71)  | 117.96 | 0; 416.77 | 203.72 (75.00)  | 208.53 | 0; 390.35  | 60.05 (74.29)   | 35.48  | 0; 381.03 | 86.13 (75.63)   | 71.47  | 0; 386.53 |
| total time spent in SY [min]                  | 1       | 6.36 (16.96)    | 0      | 0; 127.97 | 4.68 (18.81)    | 0      | 0; 228.87  | 37.13 (28.35)   | 32.79  | 0; 177.23 | 19.75 (22.58)   | 13.33  | 0; 256.7  |
|                                               | 2       | 40.82 (40.36)   | 31.04  | 0; 272.23 | 25.94 (38.35)   | 8.73   | 0; 265.15  | 13.78 (16.80)   | 7.93   | 0; 192    | 1.70 (7.73)     | 0      | 0; 76.7   |
|                                               | 3       | 26.30 (31.05)   | 17.58  | 0; 313.8  | 32.16 (43.99)   | 15.24  | 0; 318.78  | 29.60 (26.22)   | 23.22  | 0; 266.22 | 10.37 (18.60)   | 1.58   | 0; 142.58 |
|                                               | 4       | 16.41 (34.83)   | 4.48   | 0; 375.43 | 61.17 (62.28)   | 39.27  | 0; 299.3   | 7.97 (14.96)    | 0.82   | 0; 115.72 | 30.16 (31.14)   | 22.43  | 0; 245    |
| total time spent in FR [min]                  | 1       | 5.94 (19.19)    | 0      | 0; 168.13 | 1.18 (7.53)     | 0      | 0; 80.55   | 30.11 (31.10)   | 22.46  | 0; 200.1  | 18.82 (31.76)   | 2.58   | 0; 248.18 |
|                                               | 2       | 56.83 (52.39)   | 43.46  | 0; 301.15 | 2.97 (11.79)    | 0      | 0; 186.82  | 7.01 (15.33)    | 0      | 0; 183.32 | 3.53 (16.81)    | 0      | 0; 193.43 |
|                                               | 3       | 26.89 (36.36)   | 11.9   | 0; 233.12 | 3.75 (12.13)    | 0      | 0; 238.58  | 19.25 (25.24)   | 9.85   | 0; 217.42 | 14.00 (30.51)   | 0      | 0; 219.53 |
|                                               | 4       | 12.30 (27.42)   | 0.93   | 0; 223.98 | 9.99 (24.82)    | 0      | 0; 237.12  | 6.16 (17.07)    | 0      | 0; 156    | 56.09 (54.69)   | 41.53  | 0; 365.4  |
| proportion of the time spent outside the barn | 1       | 0.04 (0.11)     | 0      | 0; 0.76   | 0.02 (0.05)     | 0      | 0; 0.63    | 0.27 (0.18)     | 0.24   | 0; 1      | 0.14 (0.17)     | 0.07   | 0; 1      |
|                                               | 2       | 0.34 (0.24)     | 0.31   | 0; 1      | 0.07 (0.10)     | 0.03   | 0; 0.61    | 0.07 (0.09)     | 0.03   | 0; 1      | 0.02 (0.10)     | 0      | 0; 1      |
|                                               | 3       | 0.18 (0.19)     | 0.12   | 0; 1      | 0.09 (0.12)     | 0.05   | 0; 1       | 0.17 (0.16)     | 0.14   | 0; 1      | 0.09 (0.16)     | 0.01   | 0; 1      |
|                                               | 4       | 0.1 (0.18)      | 0.02   | 0; 1      | 0.18 (0.17)     | 0.14   | 0; 0.97    | 0.05 (0.11)     | 0      | 0; 0.76   | 0.32 (0.25)     | 0.27   | 0; 1      |
| order appearing in SY                         | 1       | 45.12 (24.43)   | 45     | 1; 92     | 53.36 (25.86)   | 56.5   | 1; 97      | 39.57 (25.18)   | 41     | 1; 95     | 36.18 (21.81)   | 34     | 1; 87     |
|                                               | 2       | 41.67 (23.06)   | 42     | 1; 98     | 51.41 (26.78)   | 54     | 1; 96      | 52.48 (27.38)   | 55     | 1; 100    | 56.95 (20.05)   | 64     | 13; 84    |
|                                               | 3       | 38.95 (24.11)   | 37     | 1; 97     | 48.34 (26.36)   | 49     | 1; 97      | 41.06 (25.25)   | 39     | 1; 97     | 46.22 (23.07)   | 47     | 1; 87     |
|                                               | 4       | 48.63 (26.02)   | 52     | 1; 97     | 33.81 (24.08)   | 29     | 1; 91      | 65.18 (26.26)   | 72.5   | 1; 99     | 37.51 (22.30)   | 39     | 1; 88     |
| order leaving SY                              | 1       | 32.01 (22.58)   | 27     | 1; 85     | 34.47 (27.79)   | 27     | 1; 87      | 54.08 (25.46)   | 55     | 1; 100    | 40.74 (22.16)   | 41     | 1; 87     |
|                                               | 2       | 42.3 (25.06)    | 42     | 1; 98     | 41.11 (27.93)   | 37     | 1; 97      | 42.76 (27.38)   | 40     | 1; 99     | 27 (21.80)      | 18     | 1; 87     |
|                                               | 3       | 44.75 (24.49)   | 45     | 1; 97     | 45.16 (26.43)   | 44     | 1; 97      | 51.48 (26.34)   | 53     | 1; 99     | 35.44 (22.85)   | 33     | 1; 86     |
|                                               | 4       | 41.43 (24.84)   | 40     | 1; 97     | 52.79 (25.52)   | 55     | 1; 96      | 40.88 (28.71)   | 38     | 1; 99     | 38.60 (22.79)   | 39     | 1; 88     |
